# Supplementary material
Source: PubMed Central journal article supplement (PMC6056180)
Supplement: NIHMS884855-supplement-2.pdf [file NIHMS884855-supplement-2.pdf]

1 **SUPPLEMENTARY INFORMATION**

2 **Functional Annotation of Chemical Libraries across Diverse Biological Processes**

3 Jeff S. Piotrowski\*<sup>1,2</sup>, Sheena C. Li\*<sup>1</sup>, Raamesh Deshpande\*<sup>3</sup>, Scott W. Simpkins\*<sup>4</sup>, Justin  
4 Nelson<sup>4</sup>, Yoko Yashiroda<sup>1</sup>, Jacqueline M. Barber<sup>1</sup>, Hamid Safizadeh<sup>3,5</sup>, Erin Wilson<sup>3</sup>, Hiroki  
5 Okada<sup>6</sup>, Abraham A. Gebre<sup>6</sup>, Karen Kubo<sup>6</sup>, Nikko P. Torres<sup>7</sup>, Marissa A. LeBlanc<sup>1</sup>, Kerry  
6 Andrusiak<sup>7</sup>, Reika Okamoto<sup>1</sup>, Mami Yoshimura<sup>1</sup>, Eva DeRango-Adem<sup>7</sup>, Jolanda van Leeuwen<sup>7</sup>,  
7 Katsuhiko Shirahige<sup>8</sup>, Anastasia Baryshnikova<sup>9, 10</sup>, Grant W. Brown<sup>7,11</sup>, Hiroyuki Hirano<sup>1</sup>,  
8 Michael Costanzo<sup>7</sup>, Brenda Andrews<sup>7</sup>, Yoshikazu Ohya<sup>6</sup>, Hiroyuki Osada<sup>1§</sup>, Minoru Yoshida<sup>1§</sup>,  
9 Chad L. Myers<sup>3,4§</sup>, Charles Boone<sup>1,7§</sup>

10

11 1. RIKEN Center for Sustainable Resource Science, Wako, Saitama, Japan

12 2. Yumanity Therapeutics, Cambridge, MA, USA

13 3. University of Minnesota-Twin Cities, Department of Computer Science and Engineering,  
14 Minneapolis, Minnesota, USA

15 4. University of Minnesota-Twin Cities, Bioinformatics and Computational Biology Program,  
16 Minneapolis, Minnesota, USA

17 5. University of Minnesota-Twin Cities, Department of Electrical and Computer Engineering,  
18 Minneapolis, Minnesota, USA

19 6. University of Tokyo, Department of Integrated Biosciences, Graduate School of Frontier  
20 Sciences, Kashiwa, Chiba, Japan

21 7. University of Toronto, Donnelly Centre, Toronto, Ontario, Canada

22 8. The University of Tokyo, Institute of Molecular and Cellular Biosciences, Center for  
23 Epigenetic Disease, Laboratory of Genome Structure and Function, Yayoi 1-1-1, Bunkyo-ku,  
24 Tokyo 113-0032, Japan

25 9. Princeton University, Lewis-Sigler Institute for Integrative Genomics, Princeton, NJ 08544,  
26 USA

27 10. Calico Life Sciences, South San Francisco, CA 94080, USA

28 11. University of Toronto, Department of Biochemistry, Toronto, Ontario, Canada

29

30

31 \*Authors contributed equally to this work

32 § Correspondence to charlie.boone@utoronto.ca, chadm@umn.edu,

33 osadahiro@riken.jp, [yoshidam@riken.jp](mailto:yoshidam@riken.jp)

34

## SUPPLEMENTARY RESULTS

**Supplementary Table 1.** Comparison of chemical-genetic interaction of common compounds between this dataset, Lee et al. 2014, and Hoepfner et al. 2014.

| Piotrowski Drug names          | Hoepfer Drug names | Giaever Drug names             | Piotrowski number drugs | Hoepfner number drugs | Giaever number drugs | Piotrowski-Hoepfner Pearson correlation | Piotrowski-Giaever Pearson correlation | Hoepfner-Giaever Pearson correlation | Threeway Pearson correlation |
|--------------------------------|--------------------|--------------------------------|-------------------------|-----------------------|----------------------|-----------------------------------------|----------------------------------------|--------------------------------------|------------------------------|
| Fluconazole, CPD000471882      | 1129               | SGTC_1787, SGTC_1788, SGTC_227 | 1                       | 2                     | 3                    | 0.293                                   | 0.243                                  | 0.064                                | 0.200                        |
| Nocodazole                     | 2390               | SGTC_1875                      | 1                       | 3                     | 1                    | 0.681                                   | 0.721                                  | 0.615                                | 0.672                        |
| Benomyl                        | 991                | SGTC_229                       | 1                       | 97                    | 1                    | 0.704                                   | 0.824                                  | 0.671                                | 0.733                        |
| Chlorpromazine                 | 956                | SGTC_2728                      | 1                       | 3                     | 1                    | 0.243                                   | -0.054                                 | -0.009                               | 0.060                        |
| MMS                            | 2878               | SGTC_915                       | 1                       | 1                     | 1                    | 0.579                                   | 0.338                                  | 0.347                                | 0.422                        |
| NSC19893, CPD000038082         | 1119               | SGTC_242, SGTC_423             | 2                       | 1                     | 2                    | 0.137                                   | 0.046                                  | 0.042                                | 0.075                        |
| 5-Fluorocytosine, CPD000059047 | 3331               | SGTC_1077, SGTC_1698           | 1                       | 1                     | 2                    | 0.279                                   | 0.092                                  | 0.026                                | 0.132                        |
| Caffeine                       | 1080               | SGTC_228                       | 1                       | 4                     | 1                    | 0.446                                   | 0.236                                  | 0.154                                | 0.279                        |
| Hydroxyurea, NSC32065          | 1089               | SGTC_273                       | 3                       | 4                     | 1                    | 0.070                                   | 0.155                                  | 0.103                                | 0.109                        |

35

36

37 **Supplementary Table 2.** Top 20 compounds with distinct dual-target predictions

| <b>Compound</b> | <b>Prediction coherence</b> | <b>Target process #1</b>                                                        | <b>Target process #2</b>                                                                            |
|-----------------|-----------------------------|---------------------------------------------------------------------------------|-----------------------------------------------------------------------------------------------------|
| NPD7992         | -0.13                       | cell wall organization or biogenesis                                            | negative regulation of transcription from RNA polymerase I promoter                                 |
| NPE593          | -0.11                       | Golgi to plasma membrane transport                                              | cellular macromolecule localization                                                                 |
| NPD6955         | -0.1                        | receptor recycling                                                              | endonucleolytic cleavage to generate mature 5'-end of SSU-rRNA from (SSU-rRNA, 5.8S rRNA, LSU-rRNA) |
| NPD887          | -0.05                       | proteasomal ubiquitin-independent protein catabolic process                     | hydrogen transport                                                                                  |
| NPE738          | -0.02                       | meiotic DNA double-strand break processing                                      | fungus-type cell wall biogenesis                                                                    |
| NPD7879         | -0.01                       | DNA catabolic process                                                           | fungus-type cell wall biogenesis                                                                    |
| NPE164          | 0                           | telomere maintenance                                                            | fungus-type cell wall biogenesis                                                                    |
| NPD5925         | 0                           | DNA catabolic process                                                           | fungus-type cell wall biogenesis                                                                    |
| NPE614          | 0                           | fungus-type cell wall biogenesis                                                | DNA catabolic process                                                                               |
| Desipramine     | 0.01                        | RNA polymerase II transcriptional preinitiation complex assembly                | retrograde vesicle-mediated transport, Golgi to ER                                                  |
| NPD7371         | 0.02                        | positive regulation of cytoskeleton organization                                | phospholipid transport                                                                              |
| NPE81           | 0.03                        | energy coupled proton transmembrane transport, against electrochemical gradient | DNA-dependent transcriptional preinitiation complex assembly                                        |
| NPD1256         | 0.03                        | cytokinesis                                                                     | vesicle targeting                                                                                   |
| NPD6024         | 0.04                        | meiotic DNA double-strand break processing                                      | response to metal ion                                                                               |
| NPD5954         | 0.04                        | nuclear migration                                                               | RNA export from nucleus                                                                             |
| NPE1081         | 0.06                        | fungus-type cell wall biogenesis                                                | response to metal ion                                                                               |
| NPD838          | 0.06                        | establishment of protein localization to membrane                               | organelle localization                                                                              |
| NPD3577         | 0.06                        | nuclear-transcribed mRNA poly(A) tail shortening                                | DNA catabolic process                                                                               |
| NP214           | 0.07                        | energy coupled proton transmembrane transport, against electrochemical gradient | DNA replication                                                                                     |
| NPD401          | 0.07                        | glycosylation                                                                   | cytoplasmic translation                                                                             |

38

39

40

41 **Supplementary Table 3.** Compounds with described modes-of-action and targets in the high-confidence  
 42 predictions set

| Drug              | P-value              | GO Process                                          | GO rank | Top 5 targets                     |
|-------------------|----------------------|-----------------------------------------------------|---------|-----------------------------------|
| MMS               | $< 2 \times 10^{-5}$ | DNA metabolic process                               | 1       | TSA1, RRM3, RNR4, RNH203, MMS4    |
| Benomyl           | $< 2 \times 10^{-5}$ | tubulin complex assembly                            | 1       | TUB3, GIM3, GIM4, YKE2, CIN1      |
| Nocodazole        | $< 2 \times 10^{-5}$ | tubulin complex assembly                            | 1       | TUB3, GIM3, YKE2, GIM4, CIN1      |
| Latrunculin B     | $< 2 \times 10^{-5}$ | cellular component movement                         | 1       | PFY1, MYO5, TAF1, BIM1, CIN8      |
| FK228             | $< 2 \times 10^{-5}$ | negative regulation of chromatin silencing          | 1       | HCS1, YPL150W, SSU72, SIN3, RPD3  |
| Hedamycin         | $< 2 \times 10^{-5}$ | DNA metabolic process                               | 1       | POL3, RNR4, TSA1, RAD27, RFA3     |
| Mycophenolic acid | $< 2 \times 10^{-5}$ | DNA metabolic process                               | 1       | RAD55, RAD57, RNR4, AFT1, YPL077C |
| Trichostatin A    | $< 2 \times 10^{-5}$ | negative regulation of chromatin silencing          | 3       | TRS33, SSU72, GRH1, YPL150W, HCS1 |
| Tunicamycin       | $< 2 \times 10^{-5}$ | glycosylation                                       | 1       | ALG14, ALG5, YIL102C, ERI1, ALG13 |
| Micafungin        | $< 2 \times 10^{-5}$ | cellular component movement                         | 1       | FKS1, PFY1, ARC18, YNL181W, ILM1  |
| Furazolidone      | $< 2 \times 10^{-5}$ | Maintenance of fidelity in DNA replication          | 1       | MMS4, RNR4, SLX1, MUS81, RNH203   |
| Brefeldin A       | $< 2 \times 10^{-5}$ | RNA transport                                       | 1       | HIR2, TAF7, MED1, THP2, SUB2      |
| Acriflavine       | $< 2 \times 10^{-5}$ | base-excision repair                                | 1       | RFA2, RAD27, RFC4, HOM6, POL32    |
| Haloperidol       | $< 2 \times 10^{-5}$ | homoserine biosynthetic process                     | 1       | HOM2, ERG25, UBP3, HOM3, BRE5     |
| Aclacinomycin A   | $< 2 \times 10^{-5}$ | DNA conformation change                             | 2       | NUP60, NUP84, SUB2, TLD3, TOP1    |
| Cinerubin B       | $< 2 \times 10^{-5}$ | DNA packaging                                       | 1       | FAL1, SLD3, PDS1, SCC4, LSR4      |
| Rapamycin         | $< 2 \times 10^{-5}$ | energy coupled proton transmembrane transport       | 1       | CNB1, NBP2, SWA2, FLC2, VMA11     |
| Daunorubicin      | $< 2 \times 10^{-5}$ | Ubiquitin-dependent macromolecule catabolic process | 2       | RPT2, SPT3, UBP6, RPN11, UBX4     |
| Hydroxyurea       | $< 2 \times 10^{-5}$ | DNA conformation change                             | 2       | TOP1, TAF7, TAF1, WSS1, MMS4      |
| 5-Fluorocytosine  | $< 2 \times 10^{-5}$ | tRNA modification                                   | 1       | SWC4, ADA2, CDC7, YTA7, DBF4      |
| Camptothecin      | $4 \times 10^{-5}$   | DNA geometric change                                | 3       | SCC2, TCP1, POL2, DCC1, KTI11     |
| Caffeine          | $4 \times 10^{-5}$   | TOR signaling cascade                               | 1       | TOR1, YMR018W, STE24, KOG1, KRS1  |
| Tyrocidin B       | $4 \times 10^{-5}$   | regulation of pH                                    | 1       | GAS1, SWA2, KRE1, KRE5, BIG1      |
| Blasticidin S     | $6 \times 10^{-5}$   | transcription from RNA polymerase I promoter        | 1       | VPS28, VPS25, BTS1, YGR012W, SNM1 |
| Fluconazole       | $8 \times 10^{-5}$   | mitotic sister chromatid cohesion                   | 1       | POC4, PRP16, RPN10, HDA3, YPL150W |
| Itraconazole      | $1.8 \times 10^{-4}$ | steroid biosynthetic process                        | 16      | ERG3, RPN10, EMC6, POC4, ERG25    |
| Cisplatin         | $2.4 \times 10^{-4}$ | DNA replication                                     | 3       | SLX1, WSS1, MMS4, RNH202, RNH203  |
| Podophyllotoxin   | $2.4 \times 10^{-4}$ | RNA splicing                                        | 1       | MED1, MRP7, BIM1, SLU7, YHC1      |
| Bortezomib        |                      | No Prediction                                       |         | IRC25, POC4, EMC6, SEM1, UBX4     |
| Nigericin         |                      | No Prediction                                       |         | NUP84, SEC27, SED5, COG6, ARL1    |
| OligomycinA       |                      | No Prediction                                       |         | PDB1, POP7, MET30, MOB2, RIM8     |
| Griseofluvin      |                      | No Prediction                                       |         | SPF1, MNN2, YND1, SSS1, ERG4      |
| Polyoxin D        |                      | No Prediction                                       |         | YTA7, IPK1, BIM1, RSE1, MPS1      |

43

44

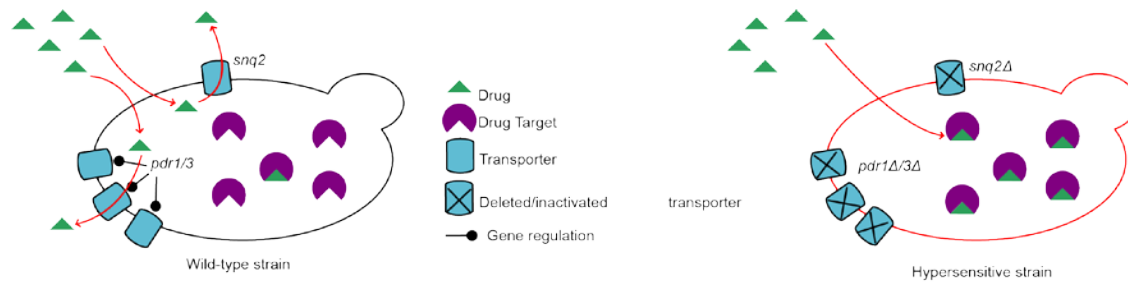

45

46 **Supplementary Figure 1. Constructing a drug sensitized yeast strain.** To construct a drug  
 47 sensitized yeast strain for chemical genomics assays, we deleted the transcription factors Pdr1p  
 48 and Pdr3p, which control much of the yeast pleiotropic drug response as well as the multidrug  
 49 transporter, Snq2p, in strain Y7092, which encodes markers and reporters necessary for SGA  
 50 analysis.

51

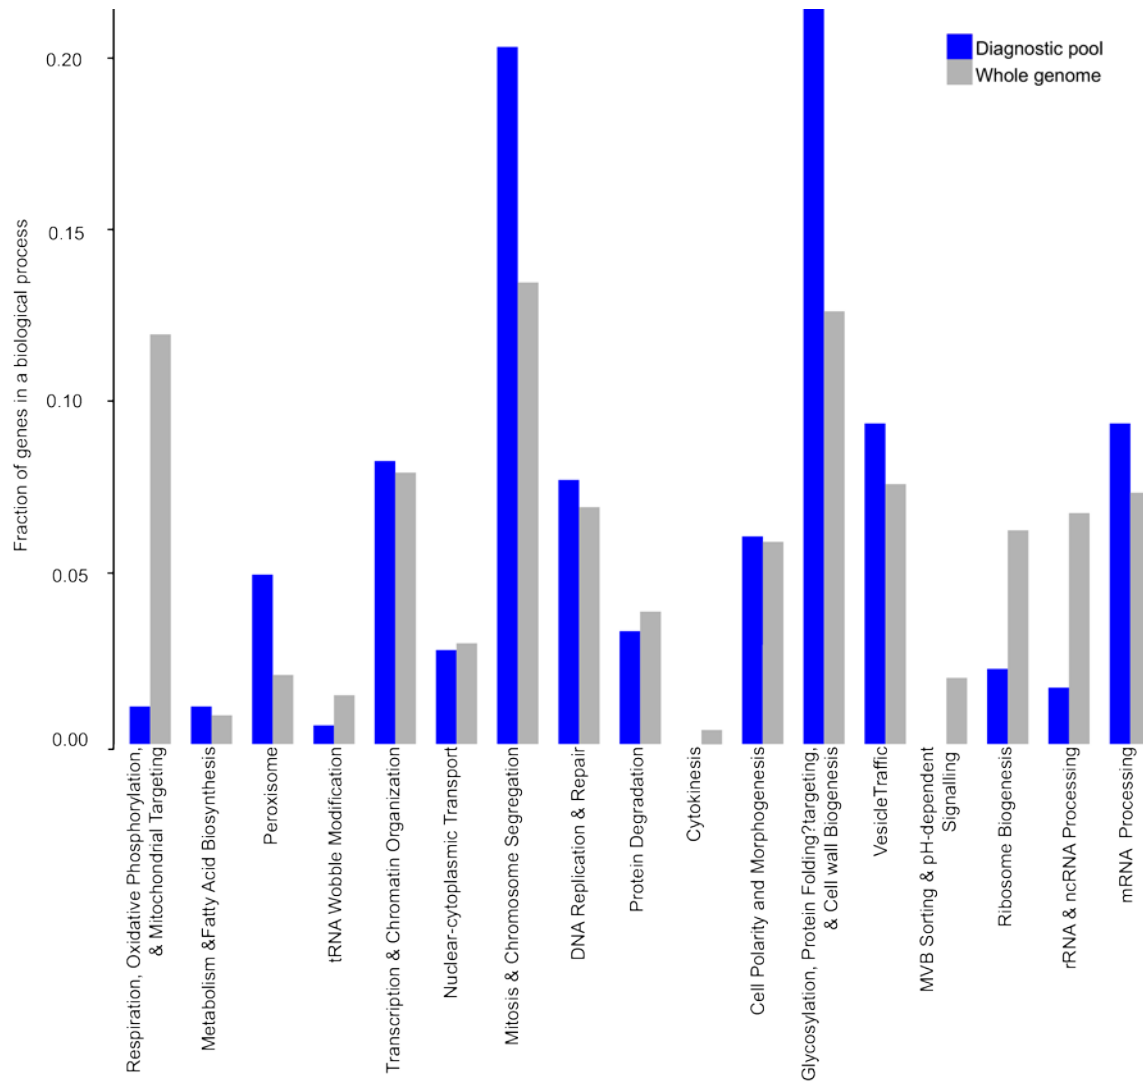

52  
 53 **Supplementary Figure 2. Functional distribution of genes in the diagnostic screening**  
 54 **collection.** Distribution of genes comprising the diagnostic set (blue) compared to that of genes  
 55 in the complete genome-wide deletion collection (grey) across the 17 major bioprocesses of the  
 56 cell.

57  
 58

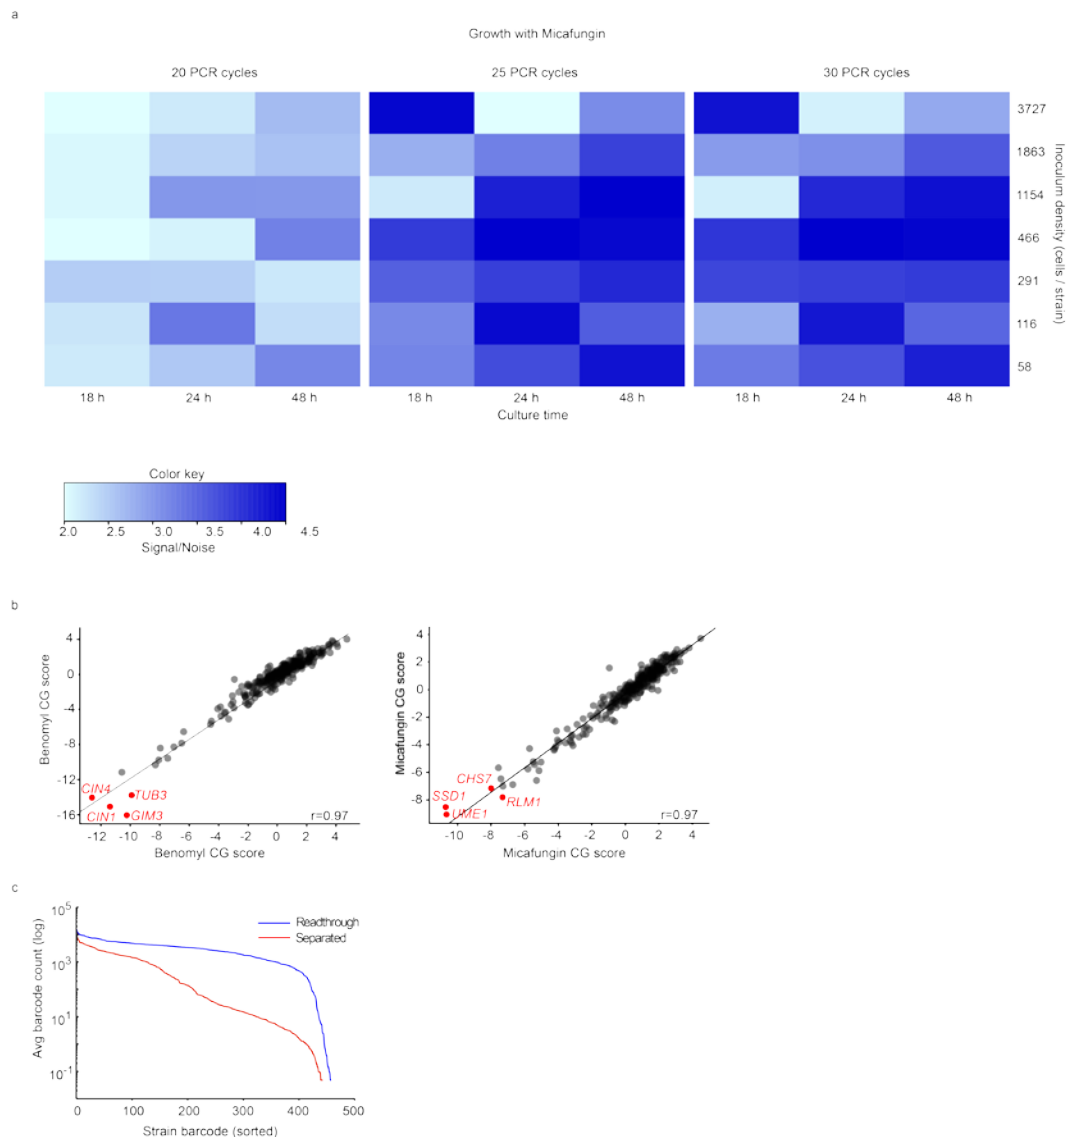

59

60 **Supplementary Figure 3. Optimizing detection of chemical-genetic interactions.** (a) The  
 61 effect of culture time, inoculum density, and PCR cycle number on the signal-to-noise ratio  
 62 within the chemical genomic profile of micafungin (25 nM). Darker blue indicates improved  
 63 signal detection of the top sensitive strains relative to the entire pool. (b) Correlation of  
 64 independent, replicate chemical genomic profiles for benomyl and micafungin. (c) Total barcode  
 65 read count yield when sequencing of the amplicon containing the multiplex tag barcode, and  
 66 mutant strain barcode is done in a single priming step (Read-through), versus yield when  
 67 sequencing is done with separate priming steps for the multiplex tag barcode and mutant strain  
 68 barcode (Separated).

69

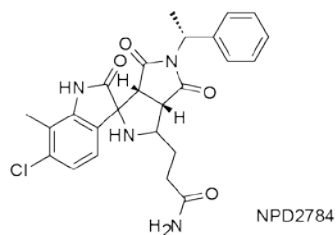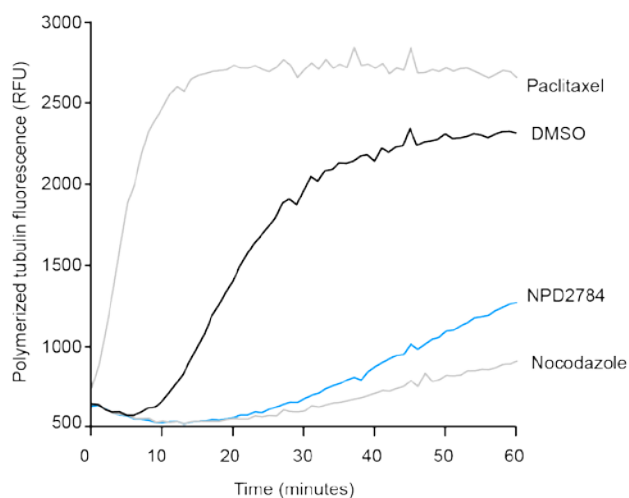

70  
71 **Supplementary Figure 4. *In vitro* tubulin polymerization in the presence of paclitaxel,**  
72 **nocodazole, NPD2784 and DMSO.** Tubulin polymerization was observed in a fluorescence-  
73 based *in vitro* assay (Cytoskeleton, Cat. #BK011P) using 10  $\mu$ M paclitaxel, 10  $\mu$ M nocodazole,  
74 21  $\mu$ M NPD2784, and 1% DMSO. In this assay, tubulin polymerization incorporates a  
75 fluorescent analog that accurately reports microtubule polymer mass in terms of relative  
76 fluorescence units (RFU). The rate of tubulin polymerization increases in the presence of  
77 paclitaxel, an anti-mitotic drug, and substantially decreases in the presence of compounds that  
78 inhibit tubulin polymerization such as nocodazole and NPD2784.  
79



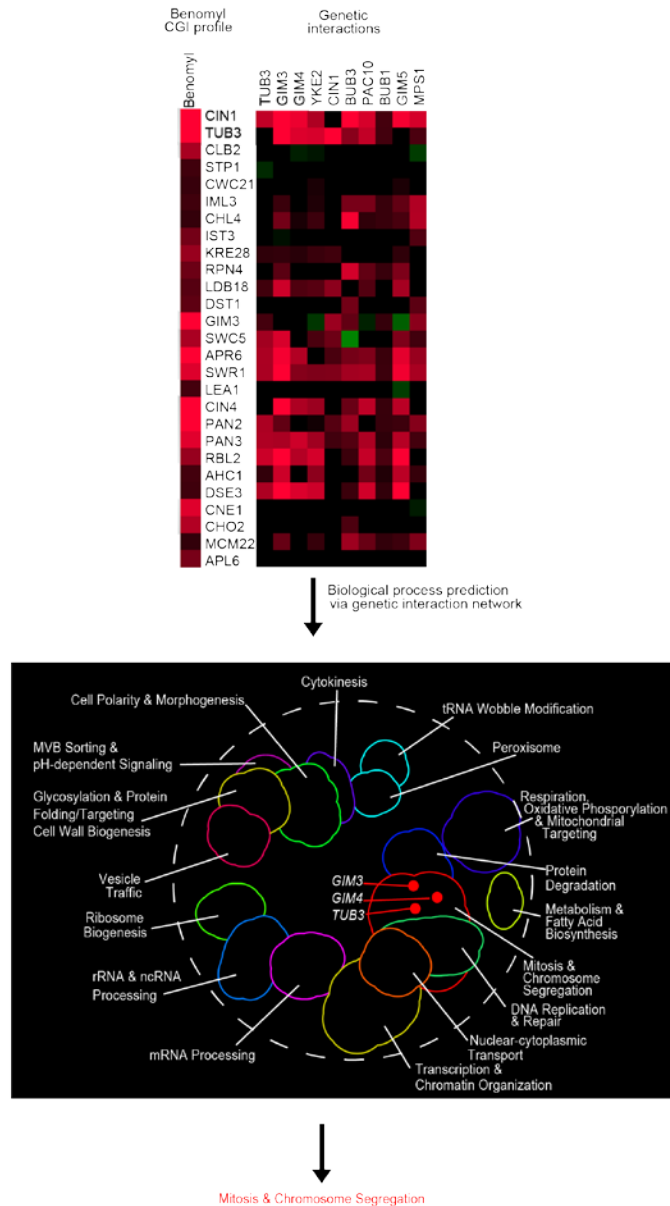

80  
 81 **Supplementary Figure 5. Schematic of target bioprocess prediction method.** *Top:* Heat maps  
 82 illustrate the set of gene mutants that are sensitive to benomyl exposure (red signal in Benomyl  
 83 CGI profile) and a subset of negative (red) and positive (green) genetic interactions associated  
 84 with the benomyl sensitive mutants (Genetic Interactions). *Bottom:* The chemical genetic profile  
 85 of a compound is correlated with the known genetic interaction network of yeast. The genes (red  
 86 nodes) whose genetic interaction profiles have the greatest correlation with the benomyl  
 87 chemical-genetic interaction profile and represent “gene-level” target predictions are indicated  
 88 on the global genetic profile similarity network. Functional enrichment among the “gene-level”  
 89 target predictions is calculated using Gene Ontology as a functional standard to provide  
 90 “process-level” target predictions.

91  
 92

93

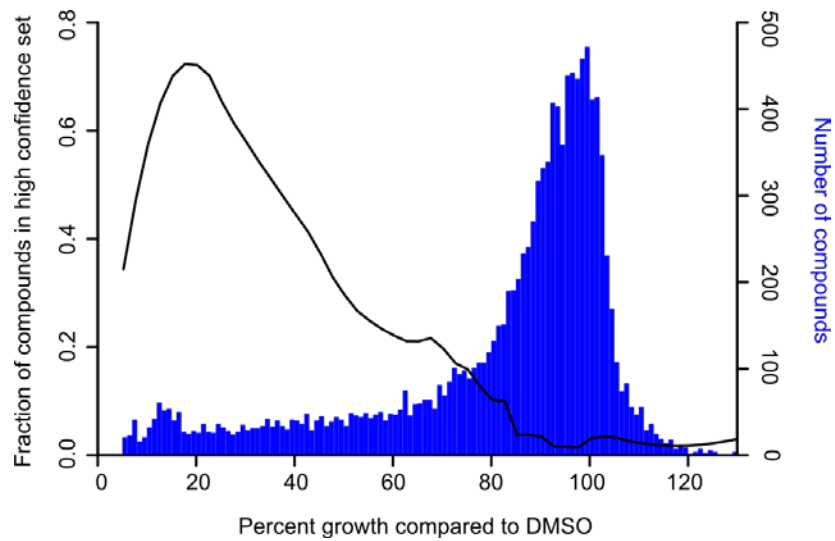

94

95 **Supplementary Figure 6. Bioactivities of all compounds in the final dataset and their**  
96 **relationship to high-confidence target prediction.** Bioactivity distribution of screened  
97 compounds (blue) and the effect of bioactivity on inclusion into the high confidence set (black)  
98 based on our false discovery rate (FDR). Greater bioactivity is correlated with confidence of  
99 target predictions, but drops off at very high bioactivity (> 80% growth inhibition).

100

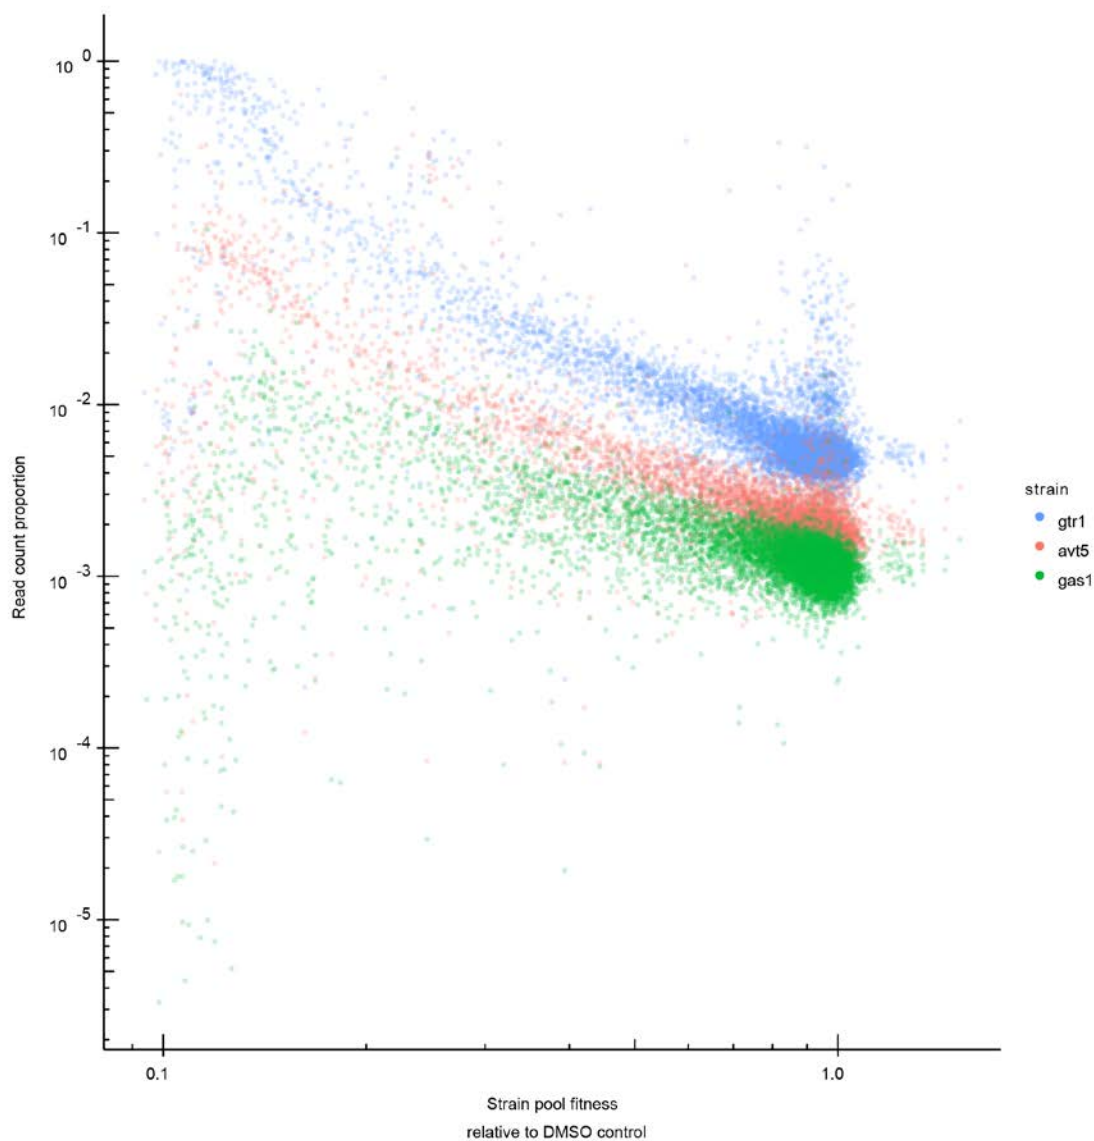

101

102

103 **Supplementary Figure 7. Relationship between bioactivity and pool overrepresentation of**

104 *gtr1*Δ, *avt5*Δ and *gas1*Δ mutants. The proportion of read counts mapped to *gtr1*Δ, *avt5*Δ and

105 *gas1*Δ strains is inversely related to the fitness of the pooled collection in the presence of

106 compounds (x-axis, growth relative to DMSO).

107

108

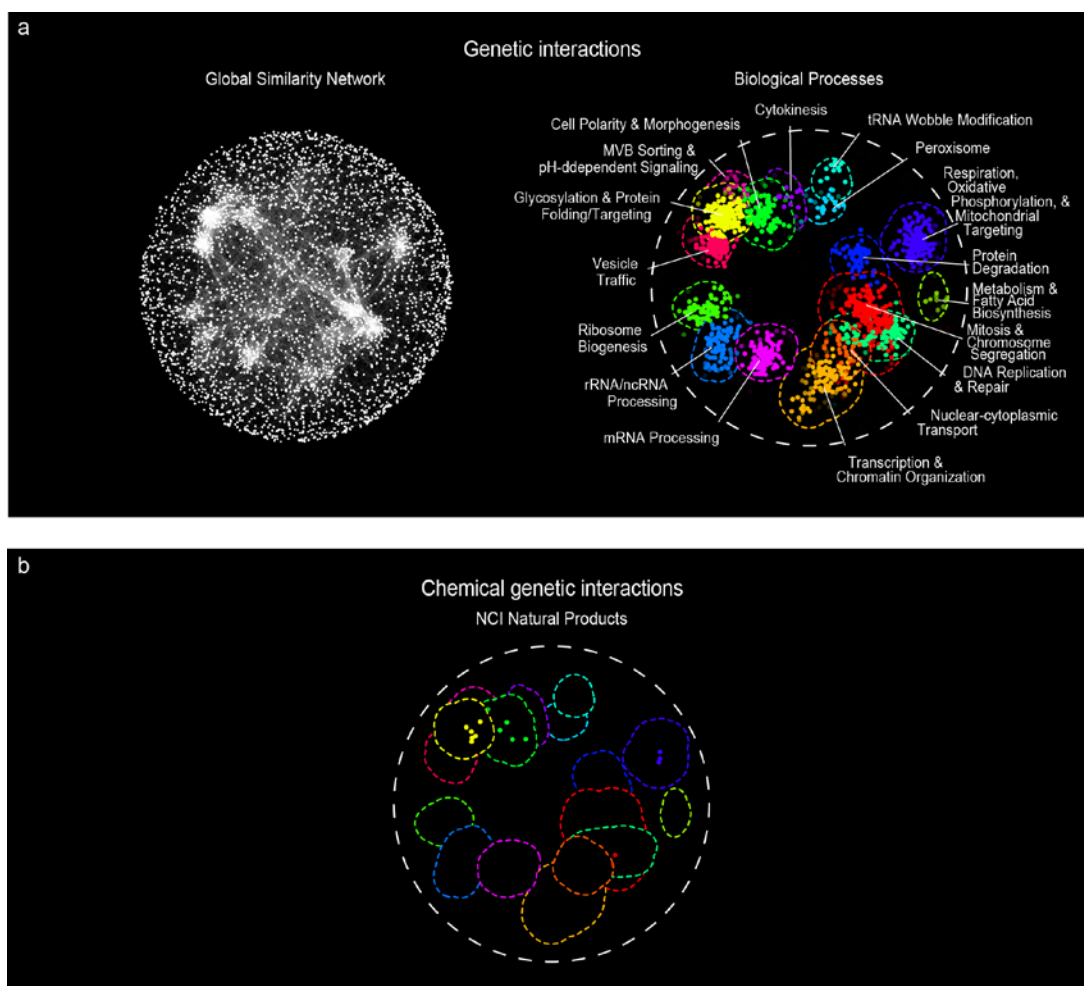

110  
 111 **Supplementary Figure 8. Functional space covered by the NCI natural products collection.**  
 112 **(a)** The global genetic interaction similarity network. Genes (nodes) that share similar genetic  
 113 interaction profiles are connected by an edge and are proximal to each other; less-similar genes  
 114 are positioned further apart. Densely connected network clusters enriched for genes with similar  
 115 functional annotations and corresponding to distinct biological processes are indicated and color  
 116 coded. **(b)** Compounds of the NCI Natural Product collection predicted to target specific genes  
 117 are presented as a node on the network map, where each node corresponds to the top gene-level  
 118 target in one compound's top process-level target. Compounds are colored according to the color  
 119 of the biological process-enriched cluster shown in **(a)**.

120  
 121

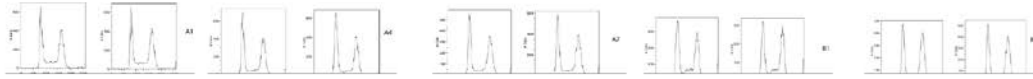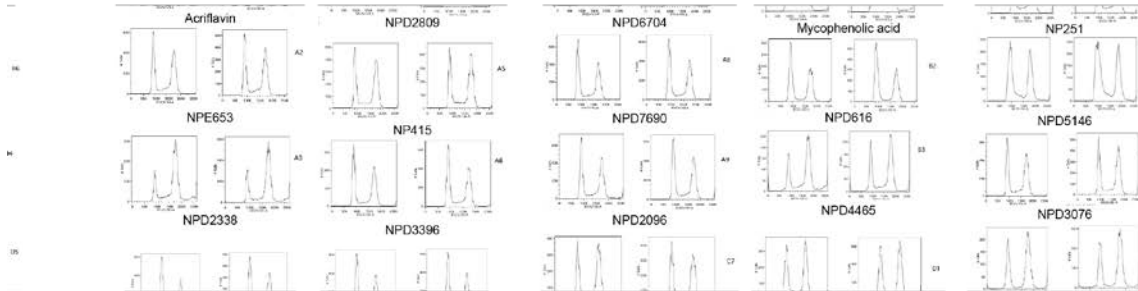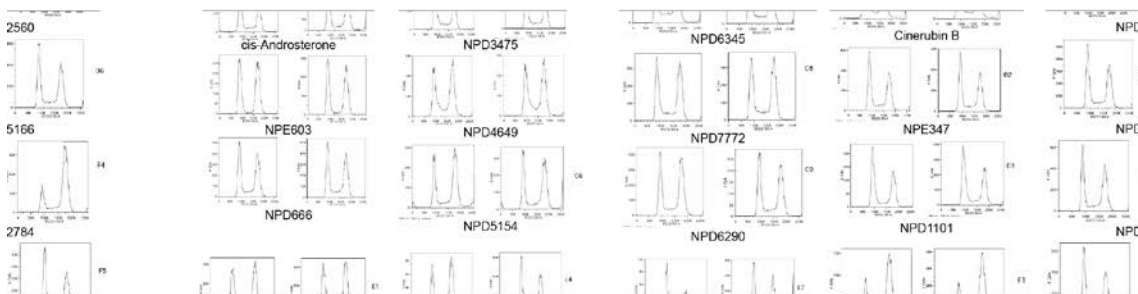

122  
 123 **Supplementary Figure 9. Cell cycle progression phenotypes associated with 71 compounds.**  
 124 Asynchronous log phase cells were treated with each compound for 4 h then prepared for flow  
 125 cytometry analysis to assess DNA content and identify compounds that result in a G1-phase  
 126 delay or arrest, S-phase delay or arrest, or G2-phase delay arrest phenotypes. Two biological  
 127 replicates presented.  
 128

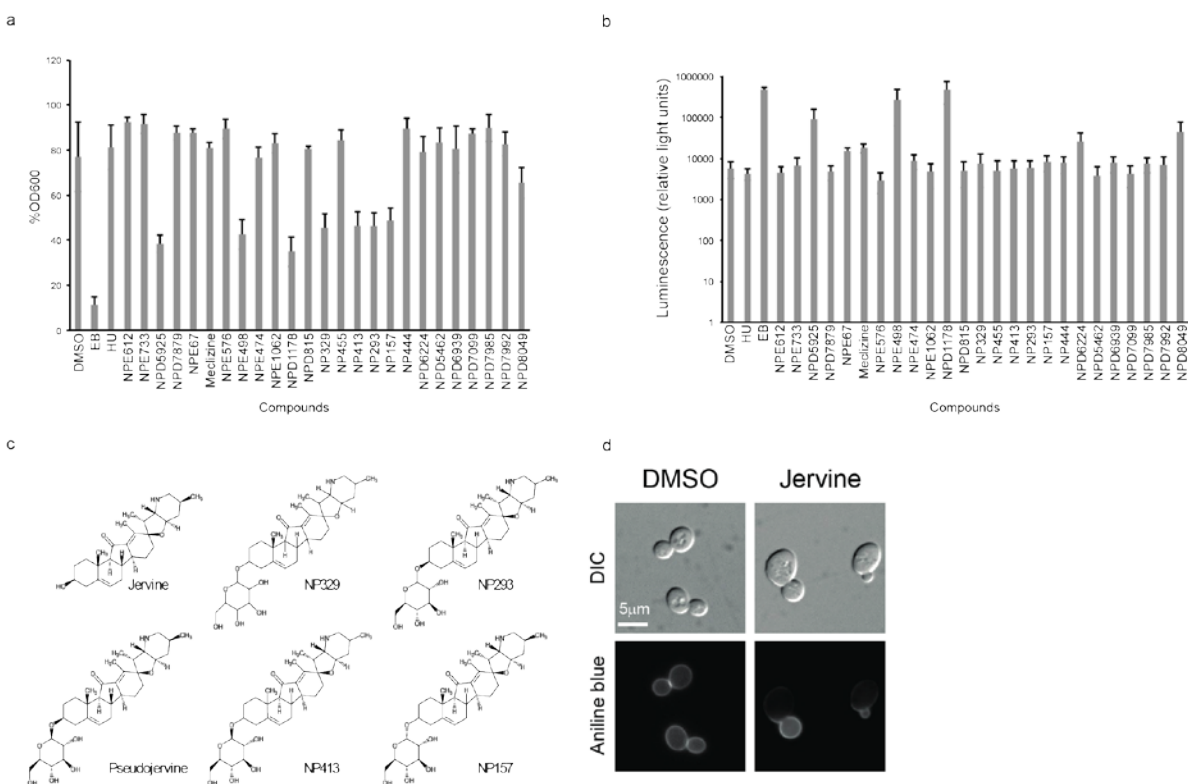

130

131

132 **Supplementary Figure 10. Phenotypic analysis of cells treated with predicted cell wall**133 **targeting agents.** Effect of zymolyase treatment on cells treated with predicted cell wall

134 targeting compounds; reduced OD600 indicated increased cell lysis in the presence of zymolyase

135 (n=3, mean ± S.E.). **(b)** Leakage of adenylate kinase from cells treated with predicted cell wall

136 targeting compounds; increase in luminescence indicates leakage of cytosolic adenylate kinase

137 resulting from compromised cell surface integrity (n=3, mean ± S.E.). **(c)** Structural comparison138 of jervine, pseudojervine, and related RIKEN NPDepo compounds **(d)**. Aniline blue staining of

139 cells treated with either jervine or DMSO.

140

141

142

143

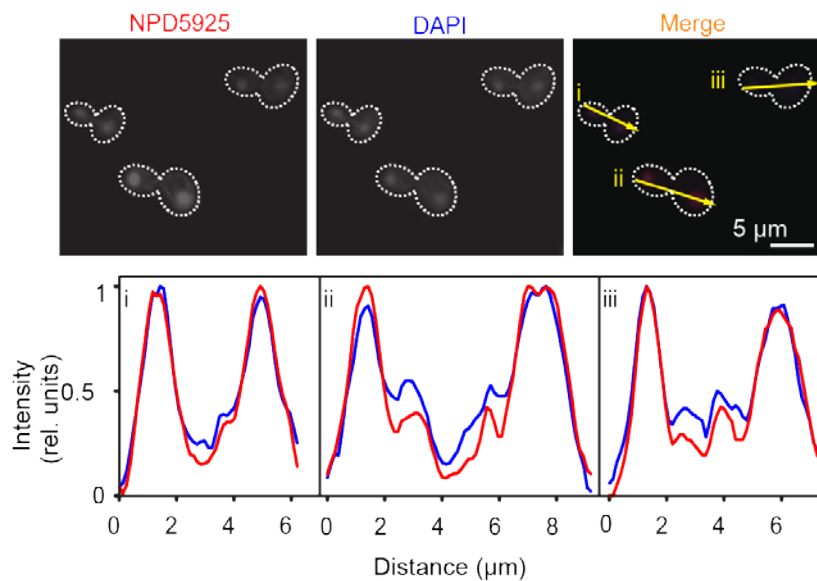

144

145 **Supplementary Figure 11. Overlay of fluorescence signals of NPD5925 and DAPI.** Yeast  
146 cells were exposed to NPD5925 and DAPI, and visualized by fluorescence microscopy. The  
147 fluorescence signals across the cells from bud to mother cell (arrows) of NPD5925 (red) and  
148 DAPI (blue) are displayed as a histogram, and are merged in right most panel.

149

150

151

152

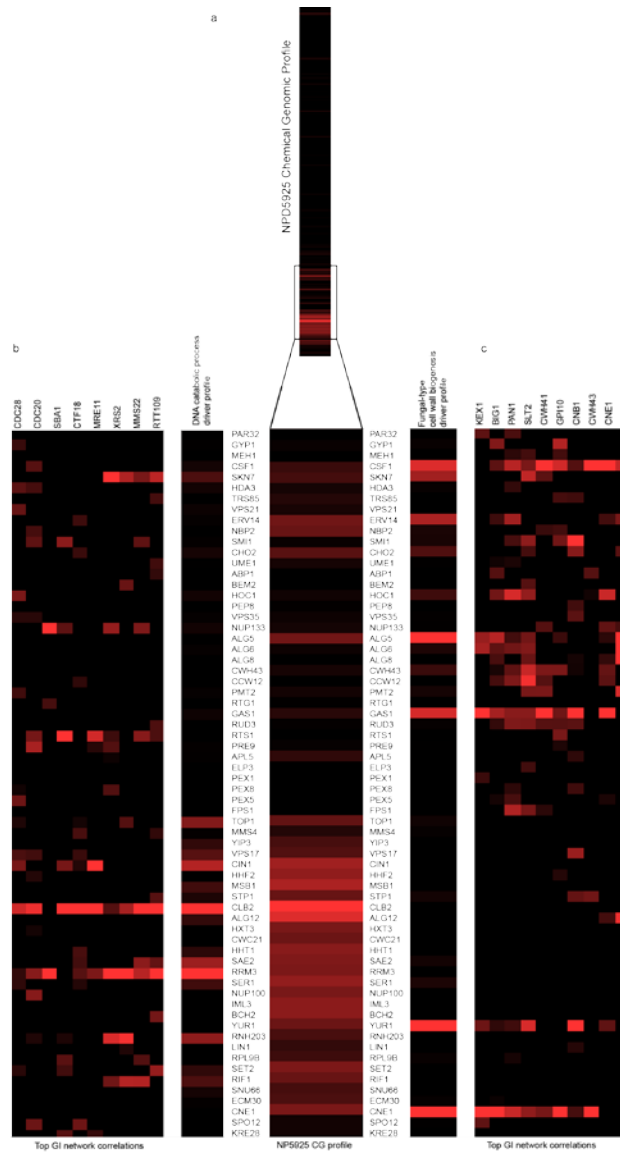

153  
 154  
 155  
 156  
 157  
 158  
 159  
 160  
 161  
 162  
 163  
 164  
 165  
 166

**Supplementary Figure 12. Detailed investigation of the genetic interaction profiles that drive dual bioprocess target predictions of NPD5925.** A heatmap illustrating the dual target nature of NPD5925. (a) The mean chemical genetic interaction profile of NPD5925 (n=3, technical replicates). Chemical-genetic interactions are shown in red. The heatmap visualizing the pleiotropy or dual target nature of NPD5925 was created by performing target prediction on the whole chemical genetic profiles, to compare for pleiotropy, or driver profiles of either GO process (b) A portion of the NPD5925 chemical-genetic profile overlaps genetic interactions associated with genes involved in DNA catabolic processes. (c) A different set of chemical genetic interactions in the NPD5925 chemical genetic profile overlaps genetic interactions associated with genes involved in fungal-type cell wall biogenesis.



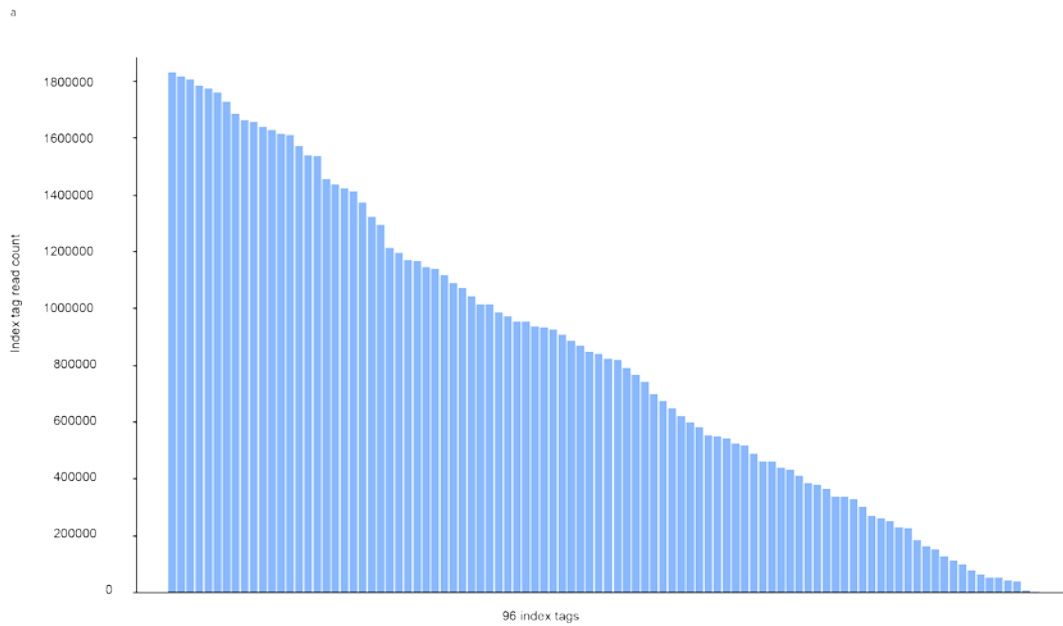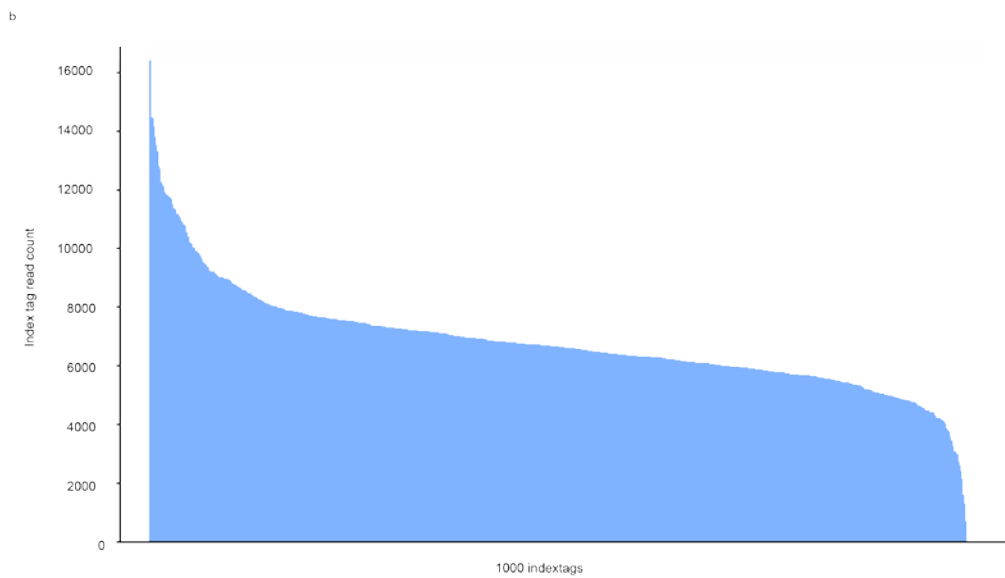

167  
 168 **Supplementary Figure 13. Barcode amplification performance of 96 multiplex tag primers,**  
 169 **and rational selection of 768 well-performing multiplex tag primers.** (a) Read count  
 170 distribution of 96 multiplex index tags used in initial pilot experiments. (b) Read count  
 171 distribution of 1000 index tags from identical DMSO treated pools. A set of 768 index tags with  
 172 near-uniform performance was selected from the 1000 index tags to give the most consistent read  
 173 counts, and tags yielding very high or low read counts were excluded.  
 174  
 175

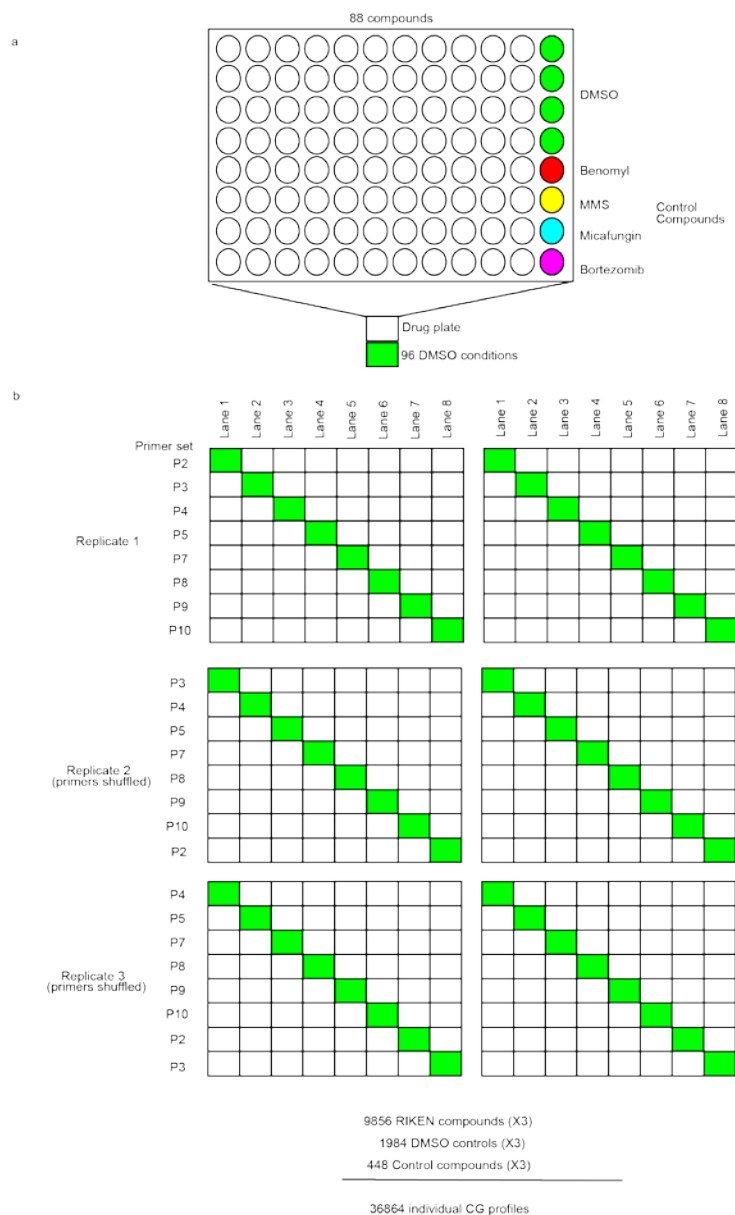

176

177

178 **Supplementary Figure 14. Design of our screening plates and sequencing strategy.** Each of  
 179 our screening plates had 88 unique compounds, 4 control compounds, and 4 DMSO control  
 180 conditions. The control compounds were benomyl, MMS, micafungin, and bortezomib for the  
 181 RIKEN screen. For the NCI/NIH/GSK screens, tunicamycin was added as a fifth control in place  
 182 of a DMSO. The control compounds and DMSO controls were included to ensure proper plate  
 183 orientation and assess any plate-specific batch effects. Each sequencing lane had 7 compound  
 184 plates and one DMSO only plate to serve as the solvent control. Our 768 indexed primers were  
 185 shuffled for each of the 3 replicates to ensure that no compound plate had the same primer set in  
 186 any replicates, to ensure we could detect and correct any potential primer biases.

187

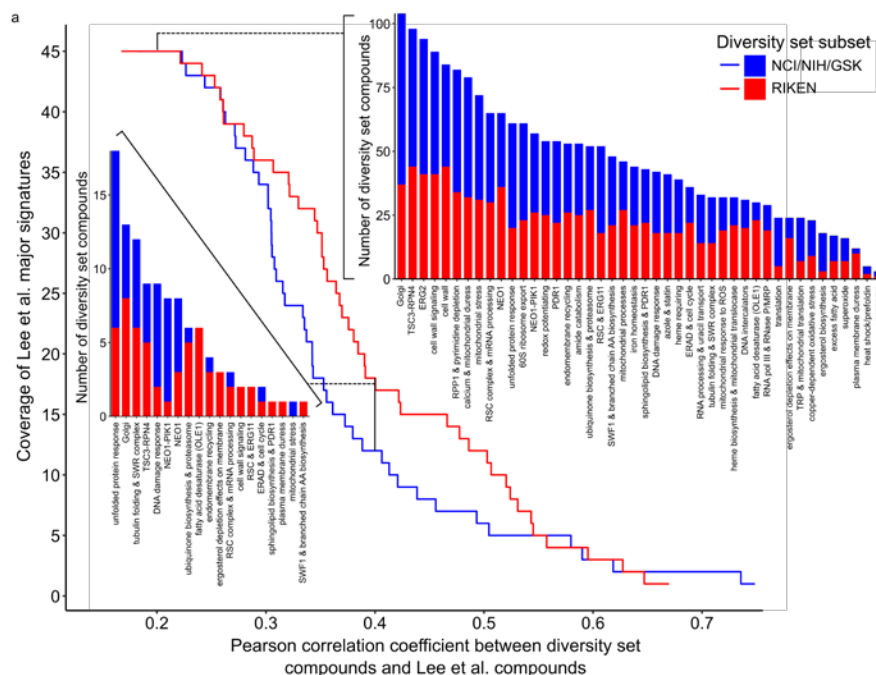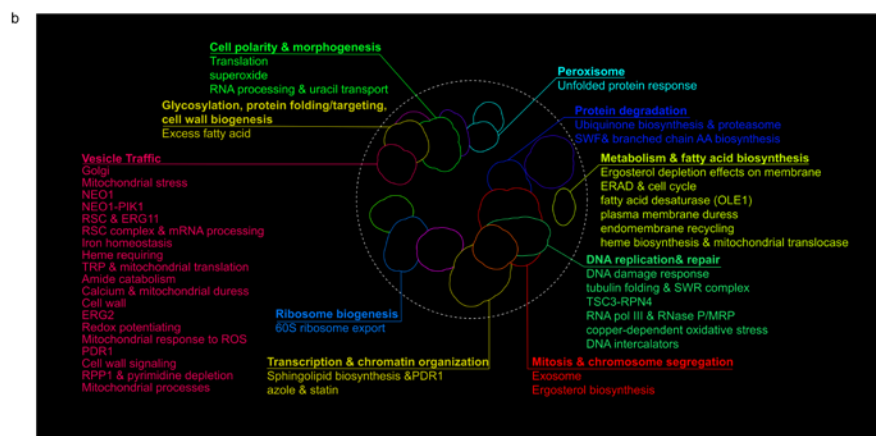

188  
 189 **Supplementary Figure 15. Overlap of diversity set compounds with previously defined**  
 190 **chemical-genetic signatures.** Compounds in each diversity set (RIKEN and NCI/NIH/GSK)  
 191 were annotated to the major chemical-genetic signatures defined in Lee et al. 2014<sup>8</sup> if they  
 192 possessed significant Pearson correlation coefficients (PCCs) above a given cutoff value to at  
 193 least one compound in a Lee et al. major signature (see **Methods**). (a) Coverage of Lee et al.  
 194 major chemical-genetic signatures by at least one RIKEN or NCI/NIH/GSK diversity set  
 195 compound as a function of PCC cutoff value. The distributions of diversity set compound  
 196 annotations across Lee et al. major chemical-genetic signatures are shown in the upper-right and  
 197 lower-left insets for PCC cutoffs of 0.2 and 0.4, respectively. (b) We mapped 43/45 chemical-  
 198 genetic signatures defined in Lee et al. 2014 to the 17 bioprocesses of Costanzo et al. 2016<sup>11</sup>.  
 199
